# Supplementary material
Source: HighWire-hosted journal article supplement (https://cancerres.aacrjournals.org/content/suppl/2013/06/06/0008-5472.CAN-13-0930)

Supplementary Fig. S2

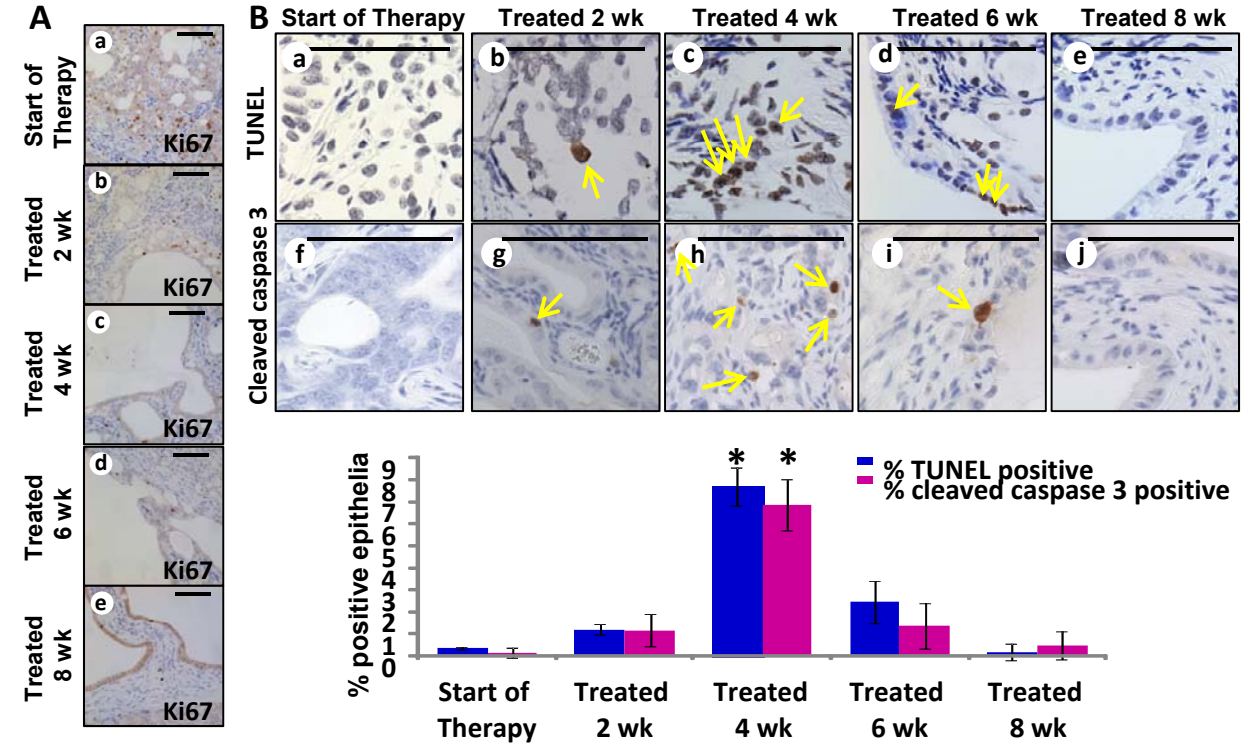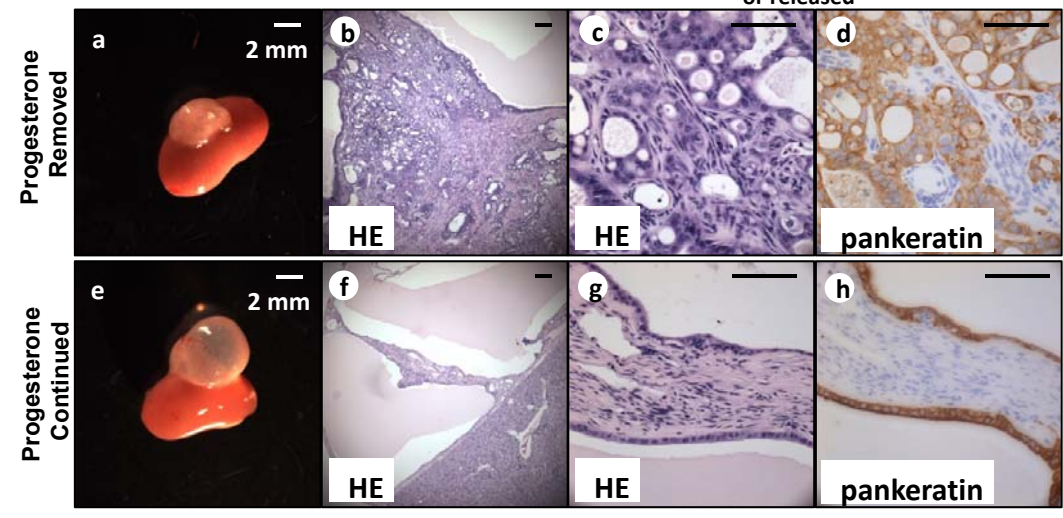

Supplement: SF2.pdf [file SF2.pdf]
